# Supplementary material for: Comprehensive transcriptomics and proteomics analyses of pollinated and parthenocarpic litchi (Litchi chinensis Sonn.) fruits during early development
Source: PubMed Central journal article supplement (PMC5511223; doi:10.1038/s41598-017-05724-z), 2017-07-14
Supplement: 41598_2017_5724_MOESM1_ESM.pdf [file 41598_2017_5724_MOESM1_ESM.pdf]

## Supplementary Information

### **Comprehensive transcriptomics and proteomics analyses of pollinated and parthenocarpic litchi (*Litchi chinensis* Sonn.) fruits during early development**

Wei Liu<sup>1,2,3,†</sup>, Maoshan Chen<sup>4,†</sup>, Lijun Bai<sup>5</sup>, Zhenhua Zhuang<sup>5</sup>, Chao Fan<sup>1,2,3</sup>, Nonghui Jiang<sup>1,2,3</sup>, Junsheng Zhao<sup>6</sup>, Shuaipeng Ma<sup>7</sup>, Xu Xiang<sup>1,2,3,\*</sup>

<sup>1</sup>Institute of Fruit Tree Research, Guangdong Academy of Agricultural Sciences, Guangzhou 510640, China.

<sup>2</sup>Key Laboratory of South Subtropical Fruit Biology and Genetic Resource Utilization, Ministry of Agriculture, Guangzhou 510640, China.

<sup>3</sup>Guangdong Provincial Key Laboratory of Tropical and Subtropical Fruit Tree Research, Guangzhou 510640, China.

<sup>4</sup>Department of Biochemistry and Genetics, La Trobe Institute for Molecular Science (LIMS), La Trobe University, Melbourne, Victoria 3086, Australia

<sup>5</sup>Chengdu Life Baseline Technology, Chengdu 610041, China

<sup>6</sup>Institute of Fruit Science in Maoming, Maoming 525000, China

<sup>7</sup>Guangzhou Experiment Station of Chinese Academy of Tropical Agricultural Sciences, Guangzhou 510140, China

†These authors contribute equally to this work

#### **\*Correspondence to:**

Xu Xiang PhD

Institute of Fruit Tree Research

Guangdong Academy of Agricultural Sciences

80 Da Feng Second Street, Tianhe District

Guangzhou 510640, China

Tel: +86 20 3876 5789

Email: [xiangxu@vip.163.com](mailto:xiangxu@vip.163.com)

**Keywords:** parthenocarpy, transcriptome, litchi, fruit development, pollination



**Fig. S2. Venn diagrams of DEPs in polLFs and parLFs at different stages.**

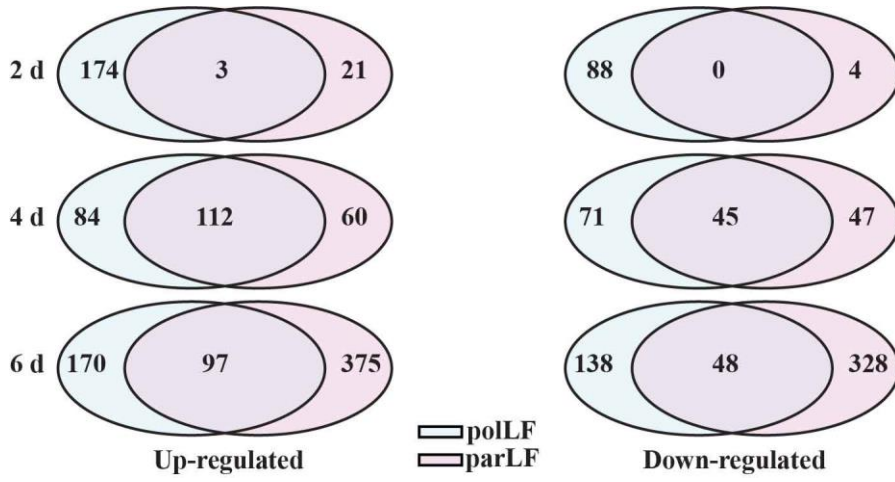

**Fig. S3. Scatter plot of consistent DEGs/DEPs in parLF6d compared to polLF6d identified by both transcriptome sequencing and iTRAQ.**

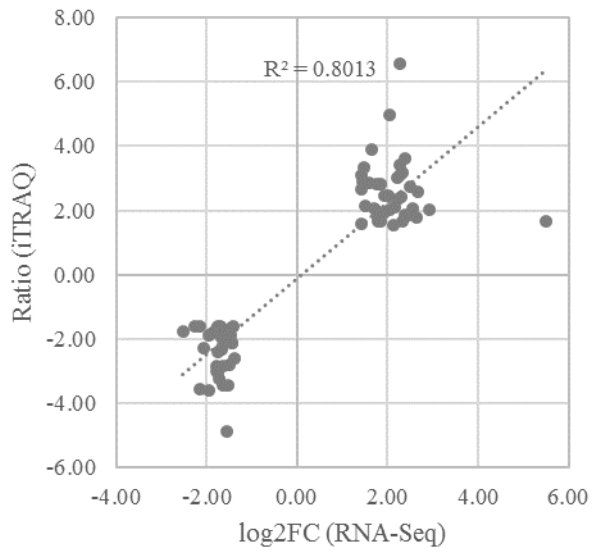

**Table S1. KEGG pathway enrichment of DEGs in polLFs and parLFs**

| Group                                       | KEGG pathway                                          | KO_id   | polLFs <sup>a</sup> | q-value <sup>c</sup> | parLFs <sup>b</sup> | q-value <sup>c</sup> |
|---------------------------------------------|-------------------------------------------------------|---------|---------------------|----------------------|---------------------|----------------------|
| Global and overview maps                    | Metabolic pathways                                    | ko01100 | 991                 | 7.57E-14             | 783                 | 7.44E-14             |
| Global and overview maps                    | Biosynthesis of secondary metabolites                 | ko01110 | 668                 | 7.57E-14             | 565                 | 7.44E-14             |
| Global and overview maps                    | Microbial metabolism in diverse environments          | ko01120 | 192                 | 8.92E-08             | 155                 | 2.08E-07             |
| Global and overview maps                    | Biosynthesis of antibiotics                           | ko01130 | 194                 | 1.53E-11             | 154                 | 7.54E-10             |
| Translation                                 | Ribosome                                              | ko03010 | 216                 | 7.57E-14             | 150                 | 7.44E-14             |
| Signal transduction                         | Plant hormone signal transduction                     | ko04075 | 165                 | 2.21E-10             | 132                 | 4.13E-09             |
| Global and overview maps                    | Carbon metabolism                                     | ko01200 | 124                 | 4.72E-08             | 99                  | 6.12E-07             |
| Biosynthesis of other secondary metabolites | Phenylpropanoid biosynthesis                          | ko00940 | 113                 | 0.000654             | 92                  | 0.000658             |
| Folding, sorting and degradation            | Protein processing in endoplasmic reticulum           | ko04141 | 88                  | 0.184487             | 90                  | 1.93E-06             |
| Biosynthesis of other secondary metabolites | Flavonoid biosynthesis                                | ko00941 | 72                  | 1.32E-07             | 67                  | 1.67E-10             |
| Carbohydrate metabolism                     | Pentose and glucuronate interconversions              | ko00040 | 66                  | 0.00989              | 64                  | 5.75E-06             |
| Carbohydrate metabolism                     | Glycolysis / Gluconeogenesis                          | ko00010 | 76                  | 1.33E-05             | 57                  | 0.001597             |
| Biosynthesis of other secondary metabolites | Stilbenoid, diarylheptanoid and gingerol biosynthesis | ko00945 | 53                  | 0.033826             | 51                  | 0.000105             |
| Transport and catabolism                    | Phagosome                                             | ko04145 | 56                  | 1.27E-06             | 47                  | 1.89E-06             |
| Cell motility                               | Regulation of actin cytoskeleton                      | ko04810 | 53                  | 2.32E-07             | 45                  | 2.64E-07             |
| Xenobiotics biodegradation and metabolism   | Metabolism of xenobiotics by cytochrome P450          | ko00980 | 42                  | 0.002648             | 44                  | 2.65E-07             |
| Environmental adaptation                    | Circadian rhythm - plant                              | ko04712 | 53                  | 0.000148             | 43                  | 0.00052              |
| Carbohydrate metabolism                     | Pyruvate metabolism                                   | ko00620 | 56                  | 7.52E-08             | 41                  | 9.3E-05              |
| Lipid metabolism                            | Glycerolipid metabolism                               | ko00561 | 44                  | 0.44892              | 41                  | 0.013469             |
| Endocrine system                            | Glucagon signaling pathway                            | ko04922 | 59                  | 1.39E-06             | 40                  | 0.010184             |
| Endocrine system                            | Estrogen signaling pathway                            | ko04915 | 43                  | 0.52804              | 40                  | 0.018137             |
| Carbohydrate metabolism                     | Galactose metabolism                                  | ko00052 | 51                  | 0.003143             | 39                  | 0.042081             |
| Global and overview maps                    | Fatty acid metabolism                                 | ko01212 | 49                  | 2.77E-06             | 39                  | 4.59E-05             |
| Transport and catabolism                    | Peroxisome                                            | ko04146 | 44                  | 0.004035             | 37                  | 0.003133             |
| Xenobiotics biodegradation and metabolism   | Drug metabolism - cytochrome P450                     | ko00982 | 34                  | 0.581016             | 37                  | 0.000257             |
| Lipid metabolism                            | alpha-Linolenic acid metabolism                       | ko00592 | 46                  | 6.7E-08              | 36                  | 5.22E-06             |
| Metabolism of other amino acids             | Glutathione metabolism                                | ko00480 | 32                  | 0.401104             | 32                  | 0.003427             |
| Metabolism of terpenoids and polyketides    | Terpenoid backbone biosynthesis                       | ko00900 | 32                  | 1                    | 32                  | 0.016755             |
| Energy metabolism                           | Carbon fixation in photosynthetic organisms           | ko00710 | 39                  | 0.007644             | 31                  | 0.030913             |
| Carbohydrate metabolism                     | Ascorbate and aldarate metabolism                     | ko00053 | 36                  | 0.000165             | 29                  | 0.000984             |
| Amino acid metabolism                       | Valine, leucine and isoleucine degradation            | ko00280 | 35                  | 2.45E-07             | 28                  | 6.96E-06             |
| Lipid metabolism                            | Fatty acid degradation                                | ko00071 | 38                  | 8.11E-11             | 28                  | 4.99E-07             |
| Signal transduction                         | HIF-1 signaling pathway                               | ko04066 | 35                  | 0.001218             | 26                  | 0.041912             |
| Signal transduction                         | Rap1 signaling pathway                                | ko04015 | 33                  | 0.000697             | 25                  | 0.017177             |
| Digestive system                            | Mineral absorption                                    | ko04978 | 31                  | 4.87E-09             | 23                  | 6.35E-06             |
| Carbohydrate metabolism                     | Propanoate metabolism                                 | ko00640 | 27                  | 7.6E-06              | 21                  | 0.000292             |
| Lipid metabolism                            | Fatty acid biosynthesis                               | ko00061 | 26                  | 0.003509             | 21                  | 0.013442             |
| Lipid metabolism                            | Biosynthesis of unsaturated fatty acids               | ko01040 | 21                  | 0.001731             | 19                  | 0.000505             |
| Endocrine system                            | PPAR signaling pathway                                | ko03320 | 22                  | 0.000463             | 17                  | 0.008075             |
| Metabolism of terpenoids and polyketides    | Monoterpenoid biosynthesis                            | ko00902 | 15                  | 1                    | 16                  | 0.036335             |
| Lipid metabolism                            | Linoleic acid metabolism                              | ko00591 | 18                  | 0.016223             | 15                  | 0.030805             |
| Signaling molecules and interaction         | Cell adhesion molecules (CAMs)                        | ko04514 | 11                  | 0.005941             | 10                  | 0.003674             |
| Biosynthesis of other secondary metabolites | Aflatoxin biosynthesis                                | ko00254 | 7                   | 0.021132             | 6                   | 0.045292             |
| Amino acid metabolism                       | Cysteine and methionine metabolism                    | ko00270 | 46                  | 0.000847             | 30                  | 0.730756             |
| Cellular community                          | Focal adhesion                                        | ko04510 | 24                  | 0.004059             | 17                  | 0.216455             |
| Endocrine system                            | Insulin signaling pathway                             | ko04910 | 44                  | 0.002621             | 31                  | 0.269961             |
| Energy metabolism                           | Photosynthesis - antenna proteins                     | ko00196 | 11                  | 0.00097              | 6                   | 1                    |
| Glycan biosynthesis and metabolism          | Other glycan degradation                              | ko00511 | 48                  | 0.011565             | 37                  | 0.090922             |
| Signal transduction                         | cAMP signaling pathway                                | ko04024 | 44                  | 1.28E-05             | 27                  | 0.257691             |
| Signaling molecules and interaction         | ECM-receptor interaction                              | ko04512 | 14                  | 0.001302             | 10                  | 0.07196              |

<sup>a</sup>Number of DEGs in polLFs.<sup>b</sup>Number of DEGs in parLFs.<sup>c</sup>adjusted p-values.

**Table S2. Gene Ontology analysis of differentially expressed genes in pollFs**

| Category                                     | GO term                                                                           | Gene number | p-value   | q-value <sup>a</sup> |
|----------------------------------------------|-----------------------------------------------------------------------------------|-------------|-----------|----------------------|
| Biological process                           | GO:0035335~peptidyl-tyrosine dephosphorylation                                    | 8           | 2.2E-16   | 3.16E-13             |
|                                              | GO:0016485~protein processing                                                     | 6           | 2.3E-09   | 3.31E-06             |
|                                              | GO:0006098~pentose-phosphate shunt                                                | 19          | 1.46E-08  | 2.1E-05              |
|                                              | GO:0080051~cutin transport                                                        | 2           | 3.631E-06 | 0.005218             |
|                                              | GO:0044805~late nucleophagy                                                       | 1           | 3.763E-06 | 0.005407             |
|                                              | GO:0080129~proteasome core complex assembly                                       | 13          | 3.782E-06 | 0.005435             |
|                                              | GO:0007346~regulation of mitotic cell cycle                                       | 5           | 5.594E-06 | 0.008039             |
|                                              | GO:0033356~UDP-L-arabinose metabolic process                                      | 5           | 6.272E-06 | 0.009013             |
|                                              | GO:0009639~response to red or far red light                                       | 1           | 6.281E-06 | 0.009026             |
|                                              | GO:0006662~glycerol ether metabolic process                                       | 10          | 1.016E-05 | 0.0146               |
|                                              | GO:0019243~methylglyoxal catabolic process to D-lactate via S-lactoyl-glutathione | 8           | 1.238E-05 | 0.01779              |
|                                              | GO:0007094~mitotic spindle assembly checkpoint                                    | 1           | 1.922E-05 | 0.027619             |
| GO:0019432~triglyceride biosynthetic process | 1                                                                                 | 2.265E-05   | 0.032548  |                      |
| Molecular function                           | GO:0043621~protein self-association                                               | 1           | 2.2E-16   | 1.95E-13             |
|                                              | GO:0003678~DNA helicase activity                                                  | 4           | 3.788E-07 | 0.000335             |
|                                              | GO:0008113~peptide-methionine (S)-S-oxide reductase activity                      | 1           | 6.908E-07 | 0.000611             |
|                                              | GO:0003988~acetyl-CoA C-acyltransferase activity                                  | 1           | 6.032E-06 | 0.005338             |
|                                              | GO:0004471~malate dehydrogenase (decarboxylating) (NAD+) activity                 | 2           | 1.794E-05 | 0.015877             |
|                                              | GO:0008792~arginine decarboxylase activity                                        | 2           | 5.601E-05 | 0.049569             |
| Cellular component                           | GO:0022625~cytosolic large ribosomal subunit                                      | 56          | 2.2E-16   | 5.76E-14             |
|                                              | GO:0022627~cytosolic small ribosomal subunit                                      | 32          | 3.273E-13 | 8.58E-11             |
|                                              | GO:0009505~plant-type cell wall                                                   | 61          | 1.024E-12 | 2.68E-10             |
|                                              | GO:0046658~anchored component of plasma membrane                                  | 35          | 2.995E-10 | 7.85E-08             |
|                                              | GO:0000786~nucleosome                                                             | 21          | 6.044E-08 | 1.58E-05             |
|                                              | GO:0005840~ribosome                                                               | 53          | 2.086E-07 | 5.47E-05             |
|                                              | GO:0048046~apoplast                                                               | 60          | 3.635E-07 | 9.52E-05             |
|                                              | GO:0009506~plasmodesma                                                            | 110         | 3.915E-05 | 0.010257             |
|                                              | GO:0005618~cell wall                                                              | 80          | 9.073E-05 | 0.023771             |
|                                              | GO:0015935~small ribosomal subunit                                                | 10          | 0.0001054 | 0.027615             |

<sup>a</sup>adjusted p-values.

**Table S3. Gene Ontology analysis of differentially expressed genes in parLFs**

| Category                                                              | GO term                                                                                                         | Gene number | p-value  | q-value <sup>a</sup> |
|-----------------------------------------------------------------------|-----------------------------------------------------------------------------------------------------------------|-------------|----------|----------------------|
| Biological process                                                    | GO:0035428~hexose transmembrane transport                                                                       | 1           | 2.2E-16  | 2.71E-13             |
|                                                                       | GO:0051457~maintenance of protein location in nucleus                                                           | 1           | 1.26E-14 | 1.54E-11             |
|                                                                       | GO:0015780~nucleotide-sugar transport                                                                           | 1           | 3.93E-09 | 4.84E-06             |
|                                                                       | GO:0051555~flavonol biosynthetic process                                                                        | 5           | 1.06E-06 | 0.001305             |
|                                                                       | GO:0052033~pathogen-associated molecular pattern dependent induction by symbiont of host innate immune response | 2           | 1.21E-06 | 0.001487             |
|                                                                       | GO:0050896~response to stimulus                                                                                 | 21          | 2.56E-06 | 0.003152             |
|                                                                       | GO:0071310~cellular response to organic substance                                                               | 6           | 3.36E-06 | 0.004138             |
|                                                                       | GO:0090480~purine nucleotide-sugar transmembrane transport                                                      | 1           | 5.6E-06  | 0.006886             |
|                                                                       | GO:0035999~tetrahydrofolate interconversion                                                                     | 1           | 1.11E-05 | 0.013592             |
|                                                                       | GO:0016125~sterol metabolic process                                                                             | 4           | 2.35E-05 | 0.02893              |
|                                                                       | GO:0010304~PSII associated light-harvesting complex II catabolic process                                        | 2           | 3.31E-05 | 0.040725             |
| GO:0051603~proteolysis involved in cellular protein catabolic process | 8                                                                                                               | 3.51E-05    | 0.043136 |                      |
| Molecular function                                                    | GO:0004743~pyruvate kinase activity                                                                             | 4           | 2.2E-16  | 1.65E-13             |
|                                                                       | GO:0003746~translation elongation factor activity                                                               | 7           | 1.6E-07  | 0.000119             |
|                                                                       | GO:0001671~ATPase activator activity                                                                            | 2           | 3.63E-07 | 0.000272             |
|                                                                       | GO:0004471~malate dehydrogenase (decarboxylating) (NAD+) activity                                               | 2           | 4.68E-07 | 0.00035              |
|                                                                       | GO:0032050~clathrin heavy chain binding                                                                         | 1           | 5.23E-06 | 0.003914             |
|                                                                       | GO:0001653~peptide receptor activity                                                                            | 1           | 2E-05    | 0.014923             |
|                                                                       | GO:0047714~galactolipase activity                                                                               | 1           | 2.14E-05 | 0.01603              |
| GO:0003922~GMP synthase (glutamine-hydrolyzing) activity              | 2                                                                                                               | 2.51E-05    | 0.018805 |                      |
| Cellular component                                                    | GO:0022625~cytosolic large ribosomal subunit                                                                    | 41          | 1.65E-13 | 3.47E-11             |
|                                                                       | GO:0046658~anchored component of plasma membrane                                                                | 32          | 1.84E-11 | 3.86E-09             |
|                                                                       | GO:0022627~cytosolic small ribosomal subunit                                                                    | 25          | 1.56E-10 | 3.28E-08             |
|                                                                       | GO:0009505~plant-type cell wall                                                                                 | 47          | 4.13E-10 | 8.67E-08             |
|                                                                       | GO:0000786~nucleosome                                                                                           | 20          | 2.96E-09 | 6.22E-07             |
|                                                                       | GO:0048046~apoplast                                                                                             | 51          | 1.01E-07 | 2.12E-05             |
|                                                                       | GO:0005618~cell wall                                                                                            | 72          | 6.62E-07 | 0.000139             |
|                                                                       | GO:0005576~extracellular region                                                                                 | 76          | 1.16E-06 | 0.000243             |
|                                                                       | GO:0015935~small ribosomal subunit                                                                              | 9           | 6.98E-05 | 0.014666             |
| GO:0005840~ribosome                                                   | 36                                                                                                              | 0.000219    | 0.046053 |                      |

<sup>a</sup>adjusted p-values.

**Table S4. KEGG pathway enrichment of common DEPs in polLFs and parLFs**

| <b>Group</b>                                | <b>Pathway</b>                                      | <b>ID</b> | <b>Protein_number</b> | <b>q-value<sup>a</sup></b> |
|---------------------------------------------|-----------------------------------------------------|-----------|-----------------------|----------------------------|
| Global and overview maps                    | Metabolic pathways                                  | ko01100   | 104                   | 3.43E-14                   |
| Global and overview maps                    | Biosynthesis of secondary metabolites               | ko01110   | 64                    | 2.12E-10                   |
| Biosynthesis of other secondary metabolites | Phenylpropanoid biosynthesis                        | ko00940   | 20                    | 5.76E-06                   |
| Metabolism of cofactors and vitamins        | Ubiquinone and other terpenoid-quinone biosynthesis | ko00130   | 7                     | 1.00E-03                   |
| Energy metabolism                           | Photosynthesis                                      | ko00195   | 6                     | 1.66E-03                   |
| Carbohydrate metabolism                     | Amino sugar and nucleotide sugar metabolism         | ko00520   | 12                    | 3.13E-03                   |
| Amino acid metabolism                       | Phenylalanine metabolism                            | ko00360   | 8                     | 3.70E-03                   |
| Biosynthesis of other secondary metabolites | Aflatoxin biosynthesis                              | ko00254   | 3                     | 7.25E-03                   |
| Carbohydrate metabolism                     | Pyruvate metabolism                                 | ko00620   | 8                     | 1.47E-02                   |
| Glycan biosynthesis and metabolism          | Other glycan degradation                            | ko00511   | 8                     | 4.12E-02                   |
| Lipid metabolism                            | Sphingolipid metabolism                             | ko00600   | 6                     | 4.23E-02                   |

<sup>a</sup>adjusted p-values.



**Table S5. KEGG pathway enrichment of DEPs identified exclusively in parLFs**

| Group                                       | Pathway                                         | ID      | Protein_number | q-value <sup>a</sup> |
|---------------------------------------------|-------------------------------------------------|---------|----------------|----------------------|
| Global and overview maps                    | Metabolic pathways                              | ko01100 | 130            | 3.29E-11             |
| Transport and catabolism                    | Lysosome                                        | ko04142 | 16             | 1.46E-05             |
| Glycan biosynthesis and metabolism          | Other glycan degradation                        | ko00511 | 15             | 1.13E-04             |
| Translation                                 | Ribosome                                        | ko03010 | 21             | 1.39E-03             |
| Glycan biosynthesis and metabolism          | Glycosaminoglycan degradation                   | ko00531 | 8              | 2.46E-03             |
| Global and overview maps                    | Carbon metabolism                               | ko01200 | 22             | 4.88E-03             |
| Transport and catabolism                    | Phagosome                                       | ko04145 | 12             | 6.64E-03             |
| Glycan biosynthesis and metabolism          | Glycosphingolipid biosynthesis - ganglio series | ko00604 | 7              | 1.02E-02             |
| Endocrine system                            | Thyroid hormone synthesis                       | ko04918 | 5              | 2.13E-02             |
| Energy metabolism                           | Carbon fixation in photosynthetic organisms     | ko00710 | 10             | 2.15E-02             |
| Folding, sorting and degradation            | Protein processing in endoplasmic reticulum     | ko04141 | 19             | 2.96E-02             |
| Biosynthesis of other secondary metabolites | Phenylpropanoid biosynthesis                    | ko00940 | 21             | 3.02E-02             |
| Global and overview maps                    | Biosynthesis of antibiotics                     | ko01130 | 28             | 3.12E-02             |
| Signaling molecules and interaction         | Cell adhesion molecules (CAMs)                  | ko04514 | 4              | 4.02E-02             |

<sup>a</sup>adjusted p-values.

**Table S6. KEGG pathway enrichment of DEPs identified parLFs compared to polLFs**

| Stage | Group                                       | Pathway                                             | ID      | Protein_number | q-value <sup>a</sup> |
|-------|---------------------------------------------|-----------------------------------------------------|---------|----------------|----------------------|
| 2d    | Global and overview maps                    | Metabolic pathways                                  | ko01100 | 163            | 5.72E-14             |
|       | Global and overview maps                    | Biosynthesis of secondary metabolites               | ko01110 | 102            | 1.04E-05             |
|       | Transcription                               | Spliceosome                                         | ko03040 | 24             | 3.35E-04             |
|       | Biosynthesis of other secondary metabolites | Phenylpropanoid biosynthesis                        | ko00940 | 27             | 2.36E-03             |
|       | Energy metabolism                           | Photosynthesis                                      | ko00195 | 8              | 4.96E-03             |
|       | Carbohydrate metabolism                     | Amino sugar and nucleotide sugar metabolism         | ko00520 | 18             | 1.75E-02             |
|       | Global and overview maps                    | Carbon metabolism                                   | ko01200 | 24             | 2.05E-02             |
|       | Global and overview maps                    | Biosynthesis of antibiotics                         | ko01130 | 33             | 2.80E-02             |
| 4d    | Transport and catabolism                    | Peroxisome                                          | ko04146 | 12             | 2.83E-02             |
|       | Translation                                 | RNA transport                                       | ko03013 | 8              | 0.002219             |
| 6d    | Global and overview maps                    | Metabolic pathways                                  | ko01100 | 256            | 6.60E-14             |
|       | Global and overview maps                    | Biosynthesis of secondary metabolites               | ko01110 | 146            | 9.54E-11             |
|       | Global and overview maps                    | Carbon metabolism                                   | ko01200 | 44             | 2.24E-09             |
|       | Global and overview maps                    | Biosynthesis of antibiotics                         | ko01130 | 57             | 1.62E-08             |
|       | Global and overview maps                    | Microbial metabolism in diverse environments        | ko01120 | 57             | 3.81E-07             |
|       | Lipid metabolism                            | Fatty acid degradation                              | ko00071 | 14             | 2.45E-06             |
|       | Carbohydrate metabolism                     | Pyruvate metabolism                                 | ko00620 | 18             | 1.58E-04             |
|       | Energy metabolism                           | Carbon fixation in photosynthetic organisms         | ko00710 | 16             | 4.44E-04             |
|       | Carbohydrate metabolism                     | Amino sugar and nucleotide sugar metabolism         | ko00520 | 25             | 4.70E-04             |
|       | Energy metabolism                           | Carbon fixation pathways in prokaryotes             | ko00720 | 10             | 4.86E-04             |
|       | Metabolism of cofactors and vitamins        | Ubiquinone and other terpenoid-quinone biosynthesis | ko00130 | 11             | 3.21E-03             |
|       | Transport and catabolism                    | Peroxisome                                          | ko04146 | 15             | 1.07E-02             |
|       | Energy metabolism                           | Photosynthesis - antenna proteins                   | ko00196 | 5              | 1.38E-02             |
|       | Glycan biosynthesis and metabolism          | Other glycan degradation                            | ko00511 | 16             | 1.87E-02             |
|       | Amino acid metabolism                       | Alanine, aspartate and glutamate metabolism         | ko00250 | 12             | 1.87E-02             |
|       | Energy metabolism                           | Methane metabolism                                  | ko00680 | 14             | 2.11E-02             |
|       | Biosynthesis of other secondary metabolites | Phenylpropanoid biosynthesis                        | ko00940 | 30             | 3.20E-02             |
|       | Carbohydrate metabolism                     | Glyoxylate and dicarboxylate metabolism             | ko00630 | 15             | 3.83E-02             |
|       | Energy metabolism                           | Photosynthesis                                      | ko00195 | 8              | 4.51E-02             |
|       | Carbohydrate metabolism                     | Ascorbate and aldarate metabolism                   | ko00053 | 11             | 4.51E-02             |

<sup>a</sup>adjusted p-values.

**Table S7. KEGG pathway enrichment of co-expressed genes in parLFs and polLFs**

| Module | Group                                       | Pathway                                             | ID      | Gene_number | q-value <sup>a</sup> |
|--------|---------------------------------------------|-----------------------------------------------------|---------|-------------|----------------------|
| Brown  | Global and overview maps                    | Metabolic pathways                                  | ko01100 | 331         | 9.48E-14             |
|        | Environmental adaptation                    | Circadian rhythm - plant                            | ko04712 | 31          | 1.61E-06             |
|        | Folding, sorting and degradation            | Proteasome                                          | ko03050 | 24          | 3.85E-06             |
|        | Global and overview maps                    | Biosynthesis of antibiotics                         | ko01130 | 75          | 6.72E-05             |
|        | Global and overview maps                    | Microbial metabolism in diverse environments        | ko01120 | 77          | 4.37E-04             |
|        | Energy metabolism                           | Oxidative phosphorylation                           | ko00190 | 22          | 1.48E-03             |
|        | Global and overview maps                    | Biosynthesis of secondary metabolites               | ko01110 | 201         | 1.86E-03             |
|        | Excretory system                            | Vasopressin-regulated water reabsorption            | ko04962 | 11          | 5.18E-03             |
|        | Xenobiotics biodegradation and metabolism   | Chloroalkane and chloroalkene degradation           | ko00625 | 10          | 7.78E-03             |
|        | Global and overview maps                    | Biosynthesis of amino acids                         | ko01230 | 47          | 1.06E-02             |
|        | Amino acid metabolism                       | Phenylalanine metabolism                            | ko00360 | 19          | 1.33E-02             |
|        | Amino acid metabolism                       | Tyrosine metabolism                                 | ko00350 | 20          | 2.52E-02             |
|        | Folding, sorting and degradation            | Protein processing in endoplasmic reticulum         | ko04141 | 41          | 4.48E-02             |
| Pink   | Global and overview maps                    | Biosynthesis of secondary metabolites               | ko01110 | 103         | 5.81E-14             |
|        | Global and overview maps                    | Metabolic pathways                                  | ko01100 | 133         | 5.81E-14             |
|        | Metabolism of terpenoids and polyketides    | Sesquiterpenoid and triterpenoid biosynthesis       | ko00909 | 21          | 1.36E-10             |
|        | Metabolism of cofactors and vitamins        | Ubiquinone and other terpenoid-quinone biosynthesis | ko00130 | 10          | 6.44E-05             |
|        | Global and overview maps                    | Biosynthesis of antibiotics                         | ko01130 | 26          | 3.39E-02             |
|        | Biosynthesis of other secondary metabolites | Anthocyanin biosynthesis                            | ko00942 | 6           | 4.72E-02             |

<sup>a</sup>adjusted p-values.

**Table S8. KEGG pathway enrichment of co-expressed proteins in parLFs and polLFs**

| Module              | Group                                       | Pathway                                             | ID      | Protein_number | q-value <sup>a</sup> |
|---------------------|---------------------------------------------|-----------------------------------------------------|---------|----------------|----------------------|
| Blue                | Global and overview maps                    | Metabolic pathways                                  | ko01100 | 269            | 6.42E-14             |
|                     | Global and overview maps                    | Biosynthesis of antibiotics                         | ko01130 | 69             | 5.86E-10             |
|                     | Global and overview maps                    | Biosynthesis of secondary metabolites               | ko01110 | 165            | 1.79E-08             |
|                     | Carbohydrate metabolism                     | Amino sugar and nucleotide sugar metabolism         | ko00520 | 31             | 2.91E-05             |
|                     | Metabolism of other amino acids             | Glutathione metabolism                              | ko00480 | 18             | 1.56E-04             |
|                     | Global and overview maps                    | Biosynthesis of amino acids                         | ko01230 | 38             | 1.19E-03             |
|                     | Metabolism of cofactors and vitamins        | Pantothenate and CoA biosynthesis                   | ko00770 | 12             | 2.41E-03             |
|                     | Global and overview maps                    | Microbial metabolism in diverse environments        | ko01120 | 55             | 2.81E-03             |
|                     | Carbohydrate metabolism                     | Galactose metabolism                                | ko00052 | 20             | 3.48E-03             |
|                     | Global and overview maps                    | Carbon metabolism                                   | ko01200 | 36             | 4.90E-03             |
|                     | Glycan biosynthesis and metabolism          | Glycosphingolipid biosynthesis - globo series       | ko00603 | 7              | 6.95E-03             |
|                     | Carbohydrate metabolism                     | Pyruvate metabolism                                 | ko00620 | 17             | 1.17E-02             |
|                     | Biosynthesis of other secondary metabolites | Phenylpropanoid biosynthesis                        | ko00940 | 36             | 1.46E-02             |
|                     | Glycan biosynthesis and metabolism          | Glycosaminoglycan degradation                       | ko00531 | 10             | 2.11E-02             |
|                     | Amino acid metabolism                       | Valine, leucine and isoleucine degradation          | ko00280 | 11             | 2.30E-02             |
| Translation         | RNA transport                               | ko03013                                             | 32      | 3.80E-02       |                      |
| Brown               | Global and overview maps                    | Biosynthesis of antibiotics                         | ko01130 | 73             | 6.42E-14             |
|                     | Global and overview maps                    | Metabolic pathways                                  | ko01100 | 217            | 6.42E-14             |
|                     | Global and overview maps                    | Biosynthesis of amino acids                         | ko01230 | 51             | 3.96E-12             |
|                     | Global and overview maps                    | Microbial metabolism in diverse environments        | ko01120 | 63             | 1.43E-08             |
|                     | Global and overview maps                    | Carbon metabolism                                   | ko01200 | 43             | 7.13E-08             |
|                     | Transcription                               | Spliceosome                                         | ko03040 | 37             | 8.58E-08             |
|                     | Translation                                 | RNA transport                                       | ko03013 | 40             | 3.85E-07             |
|                     | Global and overview maps                    | Biosynthesis of secondary metabolites               | ko01110 | 139            | 2.37E-06             |
|                     | Folding, sorting and degradation            | Protein processing in endoplasmic reticulum         | ko04141 | 33             | 3.25E-04             |
|                     | Amino acid metabolism                       | Cysteine and methionine metabolism                  | ko00270 | 18             | 3.83E-04             |
|                     | Energy metabolism                           | Carbon fixation pathways in prokaryotes             | ko00720 | 10             | 8.77E-04             |
|                     | Carbohydrate metabolism                     | Pyruvate metabolism                                 | ko00620 | 17             | 1.73E-03             |
|                     | Endocrine and metabolic diseases            | Type II diabetes mellitus                           | ko04930 | 8              | 1.96E-03             |
|                     | Amino acid metabolism                       | Phenylalanine, tyrosine and tryptophan biosynthesis | ko00400 | 11             | 1.04E-02             |
|                     | Amino acid metabolism                       | Histidine metabolism                                | ko00340 | 6              | 1.34E-02             |
| Translation         | Ribosome biogenesis in eukaryotes           | ko03008                                             | 17      | 3.65E-02       |                      |
| Energy metabolism   | Sulfur metabolism                           | ko00920                                             | 8       | 3.71E-02       |                      |
| Green               | Global and overview maps                    | Metabolic pathways                                  | ko01100 | 91             | 2.09E-08             |
|                     | Global and overview maps                    | Biosynthesis of antibiotics                         | ko01130 | 31             | 3.41E-07             |
|                     | Translation                                 | Ribosome                                            | ko03010 | 19             | 5.97E-05             |
|                     | Global and overview maps                    | Biosynthesis of secondary metabolites               | ko01110 | 59             | 9.08E-04             |
|                     | Global and overview maps                    | Microbial metabolism in diverse environments        | ko01120 | 24             | 9.79E-03             |
|                     | Carbohydrate metabolism                     | Butanoate metabolism                                | ko00650 | 5              | 3.13E-02             |
|                     | Global and overview maps                    | Biosynthesis of amino acids                         | ko01230 | 16             | 3.67E-02             |
| Yellow              | Global and overview maps                    | Metabolic pathways                                  | ko01100 | 134            | 8.77E-10             |
|                     | Global and overview maps                    | Carbon metabolism                                   | ko01200 | 33             | 1.70E-08             |
|                     | Global and overview maps                    | Biosynthesis of antibiotics                         | ko01130 | 38             | 9.32E-06             |
|                     | Global and overview maps                    | Microbial metabolism in diverse environments        | ko01120 | 37             | 2.20E-04             |
|                     | Energy metabolism                           | Oxidative phosphorylation                           | ko00190 | 13             | 5.48E-04             |
|                     | Global and overview maps                    | Biosynthesis of secondary metabolites               | ko01110 | 83             | 2.66E-03             |
|                     | Folding, sorting and degradation            | Proteasome                                          | ko03050 | 11             | 2.93E-03             |
|                     | Endocrine and metabolic diseases            | Type I diabetes mellitus                            | ko04940 | 5              | 5.94E-03             |
|                     | Endocrine and metabolic diseases            | Non-alcoholic fatty liver disease (NAFLD)           | ko04932 | 9              | 1.51E-02             |
|                     | Global and overview maps                    | Biosynthesis of amino acids                         | ko01230 | 22             | 2.34E-02             |
| Signal transduction | FoxO signaling pathway                      | ko04068                                             | 9       | 3.83E-02       |                      |

<sup>a</sup>adjusted p-values.

**Table S9. Consistent DEGs/DEPs in parLFs compared to poiLFs**

| ID                    | RNA-Seq <sup>a</sup> | iTRAQ <sup>b</sup> | pro_id      | description                                            |
|-----------------------|----------------------|--------------------|-------------|--------------------------------------------------------|
| Litchi_GLEAN_10061682 | 5.51                 | 1.67               | XCP1_ARATH  | Xylem cysteine proteinase 1                            |
| Litchi_GLEAN_10049566 | 2.93                 | 2.01               | PER72_ARATH | Peroxidase 72                                          |
| Litchi_GLEAN_10065071 | 2.66                 | 2.60               | FH2_ARATH   | Formin-like protein 2                                  |
| Litchi_GLEAN_10020874 | 2.65                 | 1.79               | ASO_TOBAC   | L-ascorbate oxidase                                    |
| Litchi_GLEAN_10003635 | 2.56                 | 2.07               | 4CL2_SOYBN  | 4-coumarate--CoA ligase 2                              |
| Litchi_GLEAN_10058276 | 2.49                 | 2.74               | RLP12_ARATH | Receptor-like protein 12                               |
| Litchi_GLEAN_10031213 | 2.41                 | 1.82               | C3H53_ORYSJ | Zinc finger CCCH domain-containing protein 53          |
| Litchi_GLEAN_10008357 | 2.39                 | 1.86               | E1313_ARATH | Glucan endo-1,3-beta-glucosidase 13                    |
| Litchi_GLEAN_10038360 | 2.38                 | 3.62               | DUT_ARATH   | Deoxyuridine 5'-triphosphate nucleotidohydrolase       |
| Litchi_GLEAN_10036690 | 2.34                 | 3.19               | SUBL_ARATH  | Subtilisin-like protease                               |
| Litchi_GLEAN_10053304 | 2.32                 | 1.65               | LYM1_ARATH  | LysM domain-containing GPI-anchored protein 1          |
| Litchi_GLEAN_10049413 | 2.30                 | 2.43               | EXOL3_ARATH | Protein EXORDIUM-like 3                                |
| Litchi_GLEAN_10025692 | 2.27                 | 6.56               | LAC14_ARATH | Laccase-14                                             |
| Litchi_GLEAN_10039316 | 2.26                 | 3.42               | GPDA_ANAD2  | Glycerol-3-phosphate dehydrogenase [NAD(P)+]           |
| Litchi_GLEAN_10006890 | 2.26                 | 3.12               | SUBL_ARATH  | Subtilisin-like protease                               |
| Litchi_GLEAN_10027616 | 2.22                 | 3.02               | FLA2_ARATH  | Fasciclin-like arabinogalactan protein 2               |
| Litchi_GLEAN_10041901 | 2.21                 | 2.35               | Y5258_ARATH | Uncharacterized protein At5g22580                      |
| Litchi_GLEAN_10009972 | 2.17                 | 2.08               | SKU5_ARATH  | Monocopper oxidase-like protein SKU5                   |
| Litchi_GLEAN_10028285 | 2.12                 | 1.54               | ASOL_BRANA  | L-ascorbate oxidase homolog                            |
| Litchi_GLEAN_10014033 | 2.05                 | 2.01               | CFI3_ARATH  | Probable chalcone--flavonone isomerase 3               |
| Litchi_GLEAN_10032621 | 2.04                 | 4.99               | PALY_POPTR  | Phenylalanine ammonia-lyase                            |
| Litchi_GLEAN_10039644 | 2.01                 | 2.46               | CHS1_CAMSI  | Chalcone synthase 1                                    |
| Litchi_GLEAN_10055014 | 1.93                 | 1.92               | FL3H_PETHY  | Naringenin,2-oxoglutarate 3-dioxygenase                |
| Litchi_GLEAN_10063889 | 1.93                 | 2.45               | INVB_DAUCA  | Beta-fructofuranosidase, soluble isoenzyme I           |
| Litchi_GLEAN_10015949 | 1.84                 | 2.81               | GUN10_ARATH | Endoglucanase 10                                       |
| Litchi_GLEAN_10019144 | 1.84                 | 1.67               | SUBL_ARATH  | Subtilisin-like protease                               |
| Litchi_GLEAN_10007383 | 1.79                 | 1.73               | LAR_DESUN   | Leucoanthocyanidin reductase                           |
| Litchi_GLEAN_10015524 | 1.78                 | 1.67               | PATL6_ARATH | Patellin-6                                             |
| Litchi_GLEAN_10024056 | 1.77                 | 2.83               | PRP1_ARATH  | Proline-rich protein 1                                 |
| Litchi_GLEAN_10065046 | 1.76                 | 1.96               | XTH2_SOYBN  | Xyloglucan endotransglucosylase/hydrolase 2            |
| Litchi_GLEAN_10003238 | 1.70                 | 2.06               | PDCB3_ARATH | PLASMODESMATA CALLOSE-BINDING PROTEIN 3                |
| Litchi_GLEAN_10014880 | 1.65                 | 3.88               | ALDOL_ORYSJ | Putative aldehyde oxidase-like protein                 |
| Litchi_GLEAN_10021245 | 1.59                 | 2.85               | Y4744_ARATH | Uncharacterized protein At4g06744                      |
| Litchi_GLEAN_10007655 | 1.51                 | 2.13               | LRX2_ARATH  | Leucine-rich repeat extensin-like protein 2            |
| Litchi_GLEAN_10025986 | 1.47                 | 3.33               | XTH9_ARATH  | Xyloglucan endotransglucosylase/hydrolase protein 9    |
| Litchi_GLEAN_10042347 | 1.45                 | 2.89               | ENL1_ARATH  | Early nodulin-like protein 1                           |
| Litchi_GLEAN_10039876 | 1.43                 | 2.66               | ORYA_ORYSJ  | Oryzain alpha chain                                    |
| Litchi_GLEAN_10064182 | 1.42                 | 1.58               | CFI_CITSI   | Chalcone--flavonone isomerase                          |
| Litchi_GLEAN_10023978 | 1.41                 | 3.12               | INO1_SESIN  | Inositol-3-phosphate synthase                          |
| Litchi_GLEAN_10053488 | -1.39                | -2.61              | CHI4_ORYSJ  | Chitinase 4                                            |
| Litchi_GLEAN_10007037 | -1.41                | -1.62              | 7SB1_SOYBN  | Basic 7S globulin                                      |
| Litchi_GLEAN_10038226 | -1.43                | -2.11              | E13B_PRUPE  | Glucan endo-1,3-beta-glucosidase, basic isoform        |
| Litchi_GLEAN_10054512 | -1.43                | -2.13              | DHEA_NICPL  | Glutamate dehydrogenase A                              |
| Litchi_GLEAN_10052962 | -1.47                | -1.87              | WTR37_ARATH | WAT1-related protein At4g30420                         |
| Litchi_GLEAN_10028148 | -1.49                | -1.67              | BGAL_SOLLC  | Beta-galactosidase                                     |
| Litchi_GLEAN_10049423 | -1.50                | -2.81              | TLP_ACTDE   | Thaumatococcus-like protein                            |
| Litchi_GLEAN_10010659 | -1.54                | -3.44              | BXL1_ARATH  | Beta-D-xylosidase 1                                    |
| Litchi_GLEAN_10043707 | -1.54                | -4.87              | GLYG3_SOYBN | Glycinin G3                                            |
| Litchi_GLEAN_10048452 | -1.59                | -2.10              | LAC7_ARATH  | Laccase-7                                              |
| Litchi_GLEAN_10057272 | -1.62                | -2.84              | MBCD_SOLTU  | 2-methylacyl-CoA dehydrogenase, mitochondrial          |
| Litchi_GLEAN_10016777 | -1.64                | -3.42              | SUT31_ARATH | Sulfate transporter 3.1                                |
| Litchi_GLEAN_10053051 | -1.64                | -1.84              | 2NPD_BACSU  | Probable nitronate monooxygenase                       |
| Litchi_GLEAN_10043236 | -1.66                | -1.96              | BSP_BOSSE   | Basic secretory protease                               |
| Litchi_GLEAN_10007077 | -1.66                | -2.32              | KING1_ARATH | SNF1-related protein kinase regulatory subunit gamma-1 |
| Litchi_GLEAN_10059810 | -1.68                | -1.60              | LIRP1_ORYSJ | Light-regulated protein                                |
| Litchi_GLEAN_10049847 | -1.69                | -1.63              | PGML1_ARATH | Phosphoglycerate mutase-like protein 1                 |

|                       |       |       |             |                                                          |
|-----------------------|-------|-------|-------------|----------------------------------------------------------|
| Litchi_GLEAN_10030329 | -1.73 | -3.22 | PRPX_HORVU  | Pathogen-related protein                                 |
| Litchi_GLEAN_10007251 | -1.75 | -3.02 | ACCH1_ARATH | 1-aminocyclopropane-1-carboxylate oxidase homolog 1      |
| Litchi_GLEAN_10006178 | -1.76 | -1.59 | DBR_TOBAC   | 2-alkenal reductase (NADP(+)-dependent)                  |
| Litchi_GLEAN_10018848 | -1.76 | -2.39 | E13B_HEVBR  | Glucan endo-1,3-beta-glucosidase, basic vacuolar isoform |
| Litchi_GLEAN_10060520 | -1.78 | -3.00 | AL2B4_ARATH | Aldehyde dehydrogenase family 2 member B4, mitochondrial |
| Litchi_GLEAN_10040929 | -1.78 | -1.68 | PERX_NICSY  | Lignin-forming anionic peroxidase                        |
| Litchi_GLEAN_10012603 | -1.78 | -2.82 | RETOL_ARATH | Reticuline oxidase-like protein                          |
| Litchi_GLEAN_10057113 | -1.86 | -1.80 | TLP1_PRUPE  | Thaumatococcus-like protein 1                            |
| Litchi_GLEAN_10001487 | -1.93 | -1.89 | GATY_SALTY  | D-tagatose-1,6-bisphosphate aldolase subunit GatY        |
| Litchi_GLEAN_10012104 | -1.95 | -3.58 | ITH5_CUCMA  | Inhibitor of trypsin and hageman factor                  |
| Litchi_GLEAN_10011351 | -2.07 | -2.29 | MIRA_SYNDU  | Miraculin                                                |
| Litchi_GLEAN_10037528 | -2.14 | -1.60 | IF2P_SCHPO  | Eukaryotic translation initiation factor 5B              |
| Litchi_GLEAN_10062296 | -2.14 | -3.55 | TRNH1_ARATH | Tropinone reductase homolog At1g07440                    |
| Litchi_GLEAN_10063755 | -2.27 | -1.59 | LEC_PARPC   | Mannose/glucose-specific lectin                          |
| Litchi_GLEAN_10012605 | -2.52 | -1.75 | PSBA_PANGI  | Photosystem II protein D1                                |
